# Supplementary material for: Comparative cranial morphology in living and extinct platypuses: Feeding behavior, electroreception, and loss of teeth
Source: PubMed Central journal article supplement — Sci Adv. 2016 Oct 12;2(10):e1601329. doi: 10.1126/sciadv.1601329 (PMC5061491; doi:10.1126/sciadv.1601329), 2016-10-12
Supplement: 1601329_SM.pdf [file 1601329_SM.pdf]

Supplementary Materials for  
**Comparative cranial morphology in living and extinct platypuses:  
Feeding behavior, electroreception, and loss of teeth**

Masakazu Asahara, Masahiro Koizumi, Thomas E. Macrini, Suzanne J. Hand, Michael Archer

Published 12 October 2016, *Sci. Adv.* **2**, e1601329 (2016)

DOI: 10.1126/sciadv.1601329

**This PDF file includes:**

- fig. S1. Relationship between body mass and orbit size (anteroposterior diameter) for *Ornithorhynchus* and *Obdurodon*.
- Reference (26)

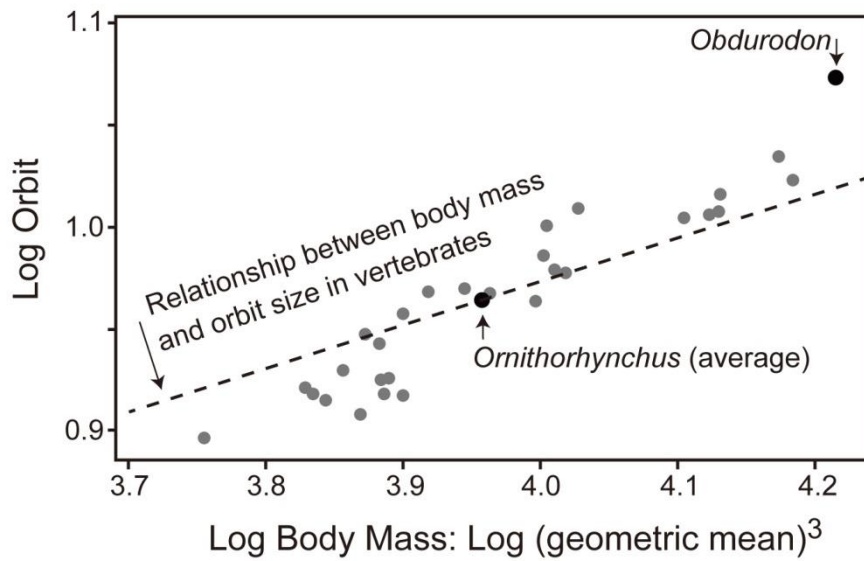

**fig. S1. Relationship between body mass and orbit size (anteroposterior diameter) for *Ornithorhynchus* and *Obdurodon*.** Relative body masses of these two species were estimated by geometric mean. The average for *Ornithorhynchus* fell along the regression line of body mass and orbit size among vertebrates (interspecific allometry) (26). The association between body mass and orbit size for *Obdurodon* fell above the regression line, indicating larger eyes in this species compared to *Ornithorhynchus* was also supported by interspecific allometry.
